**Genome- and Transcriptome-wide Splicing Associations with Problematic Alcohol Use and Alcohol Use Disorder**

Spencer B. Huggett<sup>1</sup>, Ami S. Ikeda<sup>1</sup>, Qingyue Yuan<sup>1</sup>, Chelsie E. Benca-Bachman<sup>1</sup> & Rohan H.C. Palmer<sup>1</sup>

1. *Behavioral Genetics of Addiction Laboratory, Department of Psychology at Emory University, Atlanta, GA, USA*

Corresponding Author: Spencer B. Huggett

Behavioral Genetics of Addiction Laboratory – Department of Psychology

Emory University, 36 Eagle Row

Atlanta, GA 30322, USA

Email: [Spencer.B.Huggett@emory.edu](mailto:Spencer.B.Huggett@emory.edu);

Phone: 1 (404) 727-3126;

Fax: 1 (404) 727-0372;

# words in abstract: 232

# words in manuscript: 3,487

# Figures: 5

## **Genome- and Transcriptome-wide Splicing Associations with Problematic Alcohol Use and Alcohol Use Disorder**

Spencer B. Huggett, Ami S. Ikeda, Qingyue Yuan, Chelsie E. Benca-Bachman & Rohan H.C. Palmer

### **ABSTRACT**

Genetic mechanisms of alternative mRNA splicing have been shown in the brain for a variety of neuropsychiatric traits, but not substance use disorders. Our study used RNA-sequencing data on alcohol use disorder (AUD) in the brain's reward circuitry (n=56; ages 40-73; 100% 'Caucasian'; four brain regions) and genome-wide association data on problematic alcohol use (n=435,563, ages 22-90; 100% European-American) to investigate potential genetic links with alcohol-related alternative mRNA splicing. Polygenic scores of problematic alcohol use predicted alternative mRNA brain splicing associated with AUD, which depended on brain region. Across brain regions, we found 714 differentially spliced genes in various putative addiction genes and other novel gene targets. We found 6,463 splicing quantitative trait loci (sQTLs) that were associated with the AUD differentially spliced genes. sQTLs were enriched in loose chromatin genomic regions and downstream gene targets. Additionally, the heritability of problematic alcohol use was significantly enriched for DNA variants in and around differentially spliced genes associated with AUD. Our study also performed splicing transcriptome-wide association studies (TWASs) of problematic alcohol use and other drug use traits that unveiled individual genes for follow-up and robust splicing correlations across SUDs. Finally, we show that differentially spliced genes associated showed significant overlap in primate models of chronic alcohol consumption at the gene-level in similar brain regions. Altogether, our study illuminates substantial genetic contributions of alternative mRNA splicing in relation to problematic alcohol use and AUD.

## 1 **Introduction**

2

3 Alternative mRNA splicing is the process where a single gene codes for multiple mRNA  
4 transcripts and consequently multiple proteins and gene isoforms with different structures  
5 and functions. Nearly 95% of human genes undergo alternative splicing<sup>1</sup>. Alternative  
6 mRNA splicing in the brain is a major contributor to both the genetic and neuromolecular  
7 pathology of psychiatric traits<sup>2</sup>. But researchers rarely investigate genome-wide or  
8 transcriptome-wide alternative mRNA splicing associations with substance use disorders.

9

10 Alcohol consumption induces alternative splicing events<sup>3,4</sup>, suggesting mRNA splicing  
11 could be due to chronic alcohol use. Post-mortem human brain studies identify alternative  
12 splicing associations with alcohol use disorder (AUD) highlighting specific gene isoforms  
13 among ion channels<sup>5</sup> and neurotransmitter receptors<sup>6</sup> as well as intracellular pathways and  
14 synaptic plasticity processes<sup>7</sup>. Since individuals from these studies may be at higher  
15 genetic risk for alcohol misuse, these findings may indicate that alcohol-related alternative  
16 mRNA splicing could be due to drug exposure, genetic factors, or both.

17

18 Common genetic factors, like single nucleotide polymorphisms (SNPs; individual DNA  
19 variants), account for a modest amount of variance in problematic alcohol use<sup>8</sup> and AUD<sup>9</sup>.  
20 While individual SNPs are associated with AUD and problematic alcohol use, these  
21 conditions are highly polygenic and share genetic risk factors with other substance use  
22 traits<sup>10</sup>. Outside of putative alcohol metabolism genes and neurotransmission genes, the  
23 biological basis of the genetic predisposition to AUD or problematic alcohol use remains  
24 elusive. One important mediator of genetic risk could be neuromolecular events as DNA  
25 variation has been shown to predict differentially expressed genes linked to AUD in  
26 addiction neurocircuitry<sup>11</sup>. How, or whether, alternative mRNA splicing mediates the  
27 genetic risk to AUD is unknown.

28

29 We hypothesized that genetic factors would 1) distinguish individuals with AUD from  
30 controls, 2) predict alternative mRNA splicing across addiction neurocircuitry, and 3) that  
31 differentially spliced genes would point to key targets underlying the genetic  
32 pathophysiology of problematic alcohol use. We also tested whether alternative mRNA  
33 splicing events were associated across brain regions and whether differentially spliced  
34 genes linked with AUD overlapped with primate models of chronic alcohol use. Our study  
35 sought to address these hypotheses and study aims using RNA-sequencing (RNA-seq) data  
36 on post-mortem human brain samples and primate alcohol use from multiple brain regions  
37 as well as large-scale genome-wide association studies (GWASs) on problematic alcohol  
38 use and other substance use traits. For an overview of our study see **Figure 1**.

39

## 40 **Materials and Methods**

41

### 42 *Samples*

43

#### 44 RNA-seq

45

46 Human post-mortem brain samples were collected from the New South Wales Brain  
Tissue Resource Center and included 56 genetically homogenous “Caucasian” individuals

47 (Supplementary Figure S1). Of these samples 23.22% were female and the average age  
48 was 57.34 (s.d.=8.91, range=40-73). AUD was defined as a diagnosis of either DSM-IV  
49 alcohol abuse or dependence. Controls included social or non-drinkers that were not  
50 diagnosed with AUD and were well matched on all covariates. The most common cause of  
51 death was a cardiac complication (67.9% of all samples) followed by respiratory causes.  
52 Five individuals died of alcohol toxicity. Multiple brain regions were available for each  
53 individual and included: 1) superior pre-frontal cortex (PFC; PRJNA530758), 2) nucleus  
54 accumbens (NAc; PRJNA551775), 3) central nucleus of the amygdala (CEA;  
55 PRJNA551908) and 4) basolateral amygdala (BLA; PRJNA551909). All brain samples  
56 were collected within three days of death (post-mortem interval range=9-72 hours,  
57  $M=32.81$ , s.d.=13.75 hours). For more information on this sample and RNA extraction see  
58 Rao et al. 2019<sup>11</sup>.

59  
60 Male primate samples came from four cohorts (4, 5, 7a and 7b) of Rhesus Macaques from  
61 the Monkey Alcohol Tissue Research Resource ([www.MATRR.com](http://www.MATRR.com)). Primate brain  
62 samples contained analogous brain regions as the human data, including the: 1) PFC  
63 (cortical area 32; GSE96731), 2) NAc core (GSE144783) and 3) CEA (GSE96732).  
64 Monkeys were housed individually and across cohorts had an age between 4-11 years and  
65 an average weight of 9.14 kg (s.d.=1.24). The alcohol use paradigm was described  
66 previously<sup>12</sup>. Briefly, monkeys were trained to drink a 4% alcohol solution for 4 months.  
67 After this, monkeys were permitted to self-administer alcohol for over a year with 22 hours  
68 of open access to alcohol. Primate alcohol consumption in this model is comparable to  
69 alcohol intake of human AUD<sup>13</sup>. Primate samples had five drinking categories: controls  
70 (alcohol naïve), low drinkers, high drinkers, binge drinkers or very high drinkers. To  
71 reduce multiple testing, we collapsed the top drinking categories into a single alcohol  
72 group and compared this group to the lowest drinking category (naïve controls in the NAc  
73 or the low drinking category in the PFC and CEA; note PFC and CEA samples had no  
74 naïve alcohol group). We removed samples with a normalized RNA-seq read count below  
75 two standard deviations of the group mean, which left a total of 81 primate brain samples  
76 ( $n_{NAc}=23$ ;  $n_{CEA}=28$ ;  $n_{PFC}=30$ ).

## 77 78 *GWAS*

79  
80 We used GWAS summary statistics from a study on problematic alcohol use that used  
81 435,563 individuals of European ancestry (Age range=22-90)<sup>8</sup>. This study collected  
82 individuals across three major cohorts: the 1) Million Veteran's Project, 2) Psychiatric  
83 Genomics Consortium and 3) United Kingdom BioBank, where problematic alcohol use was  
84 defined as a DSM-V AUD diagnosis, a DSM-IV alcohol dependence diagnosis, or a log<sub>10</sub>  
85 transformed metric of the Alcohol Use Disorders Identification Tests – problem drinking  
86 items.

## 87 88 *Data Preparation*

89  
90 RNA-seq data was processed using a uniform pipeline. First, we investigated RNA-seq  
91 data quality using FastQC (<https://www.bioinformatics.babraham.ac.uk/projects/fastqc/>).

92 We removed Illumina adapters and poor quality reads (reads<36bp long, leading or trailing  
93 reads<Phred score of 3 and allowing a maximum of 2 mismatches per read) using  
94 Trimmomatic (version 0.39)<sup>14</sup>. Then, we aligned trimmed reads to either the human hg19  
95 genome or the Rhesus Macaque genome (mm10) using STAR aligner version 2.5.3.a<sup>15</sup>.  
96 We followed the guidelines outlined by leafcutter  
97 (<https://davidaknowles.github.io/leafcutter>) to align RNA-seq reads and prepare data for  
98 differential splicing analyses. RNA-seq read alignment yielded an average of 78,955,738  
99 reads in humans (s.d.=29,804,777;  $M_{\text{Alignment}}=86.16\%$ ) and a mean of 34,551,920 reads in  
100 primates (s.d.=8,202,258;  $M_{\text{Alignment}}=79.71\%$ ).

101  
102 Human RNA-seq data were phased and imputed with Beagle version 5.1, which uses a  
103 probabilistic Hidden Markov Chain model that performs well for sequencing data with  
104 sparse genomic coverage<sup>16</sup>. Our analyses used standard methods for quality control  
105 including: genotyping rate > 95%, minor allele frequency > 0.10, Hardy-Weinberg  
106 equilibrium < 1e-6, read depth > 5 reads per sample, Phred Score > 20 and an imputation  
107 score > 0.3. After imputing the AUD data to the 1K Genomes Phase III all data, there were  
108 between 137,073-158,856 SNPs for sQTL analyses (# of SNPs depended on brain region).

109  
110 We applied standard quality control to the problematic alcohol use GWAS summary  
111 statistics selecting biallelic DNA variants with a minor allele frequency > 1% and  
112 imputation information score > 0.80 while also removing ambiguous and duplicate SNPs<sup>17</sup>  
113 (as recommended by: <https://choishingwan.github.io/PRS-Tutorial/base/>).

114  
115 *Analyses*

116  
117 Differential Splicing

118  
119 To detect alternative mRNA associations with AUD we used Leafcutter version 0.2.9<sup>18</sup>.  
120 Leafcutter is a powerful transcriptome-wide splicing method that uses a Dirichlet-  
121 multinomial generalized linear regression to identify differentially spliced genes. A  
122 differentially spliced gene is composed of multiple clusters, each of which includes a  
123 number of alternative splicing events, such as: exon skipping (see **Figure 1**), intron  
124 retention, alternative acceptor or alternative donor splice sites, which we annotated with  
125 the Vertebrate Alternative Splicing and Transcription Database  
126 ([https://vastdb.crg.eu/wiki/Main\\_Page](https://vastdb.crg.eu/wiki/Main_Page)). Each splicing event corresponds to a change in  
127 percent spliced in ( $\Delta\text{PSI}$  or dPSI) metric. In our AUD analyses, a positive  $\Delta\text{PSI}$  for an  
128 exon skipping event would suggest that an individual with AUD is more likely to skip a  
129 certain exon than someone without AUD. We utilized the default filtering parameters of  
130 Leafcutter that filtered out splicing clusters with < 5 samplers per intron, < 3 samples per  
131 group and required at least 20 reads, which resulted in 18,685 unique genes across human  
132 brain regions. Differentially spliced genes/clusters were those that survived a standard  
133 Benjamini-Hochberg False Discovery (BH-FDR) rate < 0.05. Since only 21 genes were  
134 differentially spliced in primates (BH-FDR<.05), we defined significant differential  
135 splicing with a nominal p-value threshold < 0.05. We assessed linear correlations of the  
136  $\Delta\text{PSI}$  across all significant alternative splicing events that were common across brain  
137 regions. To assess the overlap between human and primate results we used a Fisher's Exact

138 test at the gene-level and restricted analyses to homologous genes identified by biomaRt<sup>19</sup>  
139 and only used results from analogous regions of the brain (CEA, NAc and PFC). In  
140 humans, we compared our differential splicing analyses with differentially expressed genes  
141 using DESeq2 software<sup>20</sup> and the same covariates and p-value adjustment.

142

143 Polygenic scores

144

145 We investigated two questions with polygenic score analyses. First, were human brain  
146 samples with AUD at higher genetic risk for problematic alcohol use? Second, does  
147 genetic risk for problematic alcohol use predict alternative mRNA splicing in the brain?  
148 Our study used PRScice.2 (version 2.3.3)<sup>21</sup> and elected to use standard polygenic score  
149 guidelines<sup>17</sup>, but decided not to use clumping given sparse genotypic data from RNA-  
150 sequencing. As a sanity check, we re-ran polygenic analyses with clumping and found  
151 similar results (see Supplementary Figure S2).

152

153 sQTLs

154

155 A splicing quantitative trait locus (sQTL) is a SNP that predicts alternative mRNA splicing  
156 associated with a trait. Similar to Li et al.<sup>18</sup>, we standardized excision-splicing ratios and  
157 then quantile normalized splicing data across individuals. Our analyses used default  
158 settings on MatrixQTL to find cis acting sQTLs that may affect mRNA splicing in a  
159 nearby gene, which tests all SNPS within 1 megabase (Mb) of a genomic region. sQTLs  
160 were defined as a SNP associated with a differentially spliced gene that survived a BH-  
161 FDR correction for multiple testing per SNP. To determine whether sQTLs resided in  
162 specific regions of the genome we annotated sQTLs in 11 annotation categories from  
163 ANNOVAR (version 4.1)<sup>22</sup>. The annotation categories that were built on hg18 genome  
164 coordinates were updated to their corresponding hg19 values using CrossMap (version  
165 0.5.1)<sup>23</sup>.

166

167 Partitioned Heritability

168

169 To test whether differentially spliced genes associated with AUD in the brain pointed to  
170 genetic mechanisms of alcohol misuse we performed a partitioned heritability analysis. We  
171 used LD score regression and created an annotated gene-set of differentially spliced genes  
172 (BH-FDR<.05). To be consistent with our sQTL analyses, this included SNPs within 1 Mb of  
173 the start and stop site of a differentially spliced gene, which is similar to defaults on other  
174 splicing partitioned heritability mapping tools (e.g., Li et al.<sup>24</sup>). To determine the specificity of  
175 our findings, we tested the partitioned heritability of this gene-set with a negative control trait  
176 (Joint disorders found via: <http://www.nealelab.is/uk-biobank>) that used individuals of  
177 European ancestry and had similar sample size (n~361,194), and trait heritability  
178 ( $h^2_{\text{SNP}}=0.0695$ ) as problematic alcohol use..

179

180 *Splicing TWASs*

181

182 We performed transcriptome-wide association studies (TWASs) via splicing SMulti-  
183 Xcan<sup>25,26</sup>, to assess how DNA associations predicted alternative mRNA splicing  
184 associations in human tissues. To increase power, we selected all 49 Genotype Tissue  
185 Expression (GTEx) database tissues (which included up to 838 human donors;  
186 <https://www.gtexportal.org/home/>) as done previously<sup>2</sup>. We also report results from our  
187 splicing TWAS on problematic alcohol use incorporating only the 13 GTEx brain tissues,  
188 which yielded similar results (see Supplementary File S1). SMulti-Xcan combines multiple  
189 regression and elastic neural networks to predict alternative mRNA splicing from cis-  
190 sQTLs. This method accounts for linkage disequilibrium (LD) of European ancestry using  
191 the 1K Genomes Phase 3 data. Our study assessed the convergence between the splicing  
192 TWAS on problematic alcohol use and the differentially spliced genes in the brain  
193 associated with AUD. Of the overlapping genes, we assessed SNP associations mapped to  
194 these genes that were associated with other traits via <https://www.ebi.ac.uk/gwas/>. For  
195 these genes that also had a significant sQTL we evaluated the LD between the lead sQTL  
196 SNP (smallest p-value for the gene) with the SNP listed in the GWAS catalogue using  
197 LDlink (European Ancestry; <https://ldlink.nci.nih.gov/?tab=home>). Lastly, we investigated  
198 how splicing associations generalized across substance use traits by correlating splicing  
199 TWAS results from three other GWASs: cigarettes per day (n=263,954)<sup>27</sup>, opioid use  
200 disorder (n=82,707)<sup>28</sup> and cannabis use disorder (n=374,287)<sup>29</sup>.

201

## 202 **Results**

### 203 *Polygenic scores*

204

205 Polygenic score analyses indicated that individuals with AUD were at higher genetic risk  
206 for problematic alcohol use than those without AUD (p=0.030; **Figure 2A**). Polygenic  
207 scores were predictive of alternative mRNA splicing but this depended on brain region  
208 (**Figure 2B**).

209

### 210 *Differential Splicing*

211

212 In total, we found 714 differentially spliced genes in 740 clusters encompassing 5,118  
213 unique splicing events associated with AUD (see **Figure 3A** & Supplementary File S2).  
214 Similar to previous analyses with these data, 92.3% of the reported differentially spliced  
215 genes associated with AUD<sup>7</sup>, were at least nominally significant in our analyses. From our  
216 differential splicing analyses, we identified exon skipping as the most frequent splicing  
217 event (53.9%) and found alternative splice donor events (4.0%) to be the least frequent.  
218 Differentially spliced genes were not enriched for gene ontological processes (all  
219  $p_{adj}>0.39$ ), but several addiction genes were found to be differentially spliced, including:  
220 *ALDH3A2*, *CAMK2D*, *CAMKK2*, *GRIA2*, *GRK4*, *GRK6*, *HDAC3*, *PPP2R1B* and *PRKACB*  
221 (see Supplementary Figures S3-S4). The *GRIA2* gene showed differential splicing in a  
222 putative ‘flip flop’ splicing site (see Supplementary Figure S5), which alters the rate of  
223 AMPA receptor opening<sup>30,31</sup> and has been implicated with chronic alcohol use in  
224 primates<sup>32</sup>. Notably, we found no differentially expressed genes associated with AUD for  
225 any brain region (all p>0.0012, all  $p_{adj}>0.999$ ; see Supplementary File S3).

226

227 Investigating analogous brain regions in Macaques, we found that AUD differentially  
228 *spliced* genes tended to also demonstrate differential splicing in primate models of chronic  
229 alcohol use (see Supplementary Figure S6). This overlap was more than we expected by  
230 chance, OR=1.38, 95% CI [1.06, 1.77],  $p=0.0126$ . We found significant, yet small,  
231 correlations of splicing events across brain regions in humans ( $r=0.05-0.27$ ; see **Figure**  
232 **3B**) with the largest associations observed with the BLA. In the primate data, which lacks  
233 the BLA, we found splicing event associations between PFC and CEA ( $r=0.10$ ,  $p=2e-16$ ),  
234 but negative associations between the NAc with the PFC ( $r=-0.04$ ) and NAc with CEA ( $r=-$   
235  $0.08$ , all  $p<0.002$ ).

236  
237 *sQTLs*

238  
239 Next, we tested for sQTLs, or whether specific genetic variants predicted the differentially  
240 spliced genes associated with AUD. In total, we found 6,463 unique sQTLs associated  
241 with 170 different genes ( $p_{\text{adj}}<0.05$ ; see **Figure 4A** and Supplementary File S4). Drug  
242 metabolism (*CYP2C19* and *CYP2C9*) intracellular signaling (*GRK4*, *GRK6*, *HDAC3*,  
243 *PRKACB* and *MAPK3K6*) and calcium ion channel genes (*CACNA1A*, *CACNA1G*,  
244 *CACNB2* and *KCNMA1*) had sQTL(s). Exon skipping events in the *CACNA1A* and  
245 *KCNMA1* genes corresponded to certain gene formations that differentially alter vesicular  
246 release<sup>33</sup> and activation of Ca<sup>+</sup> channels<sup>34</sup>. Most sQTLs were located in intergenic regions  
247 (52.3%) or introns (36.1%), but we only identified sQTL enrichment among DNaseI  
248 hypersensitivity sites and downstream locations of protein coding genes (see **Figure 4B**).  
249

250 *Partitioned Heritability*

251  
252 We further investigated the role of alternative splicing for the genetic basis of problematic  
253 alcohol use. Using LDscore regression we observed that heritable influences explained  
254 7.81% of the individual differences in problematic alcohol use. Our partitioned heritability  
255 analyses revealed that SNPs in and around differentially spliced genes accounted for 30%  
256 of the genetic risk for problematic alcohol use (OR=1.349,  $se=0.064$ ,  $p=6.46e-7$ ; see  
257 **Figure 5**), but not for our negative control trait (Joint disorders,  $p=0.161$ ).  
258

259 *Splicing TWASs*

260  
261 We found 311 splicing TWAS associations with problematic alcohol use ( $p_{\text{adj}}<0.05$ ; 215  
262 unique genes; see Supplementary File S5), which were enriched for alcohol dehydrogenase  
263 activity ( $p_{\text{adj}}=3.23e-10$ ). Seven of the TWAS splicing genes were also differentially spliced  
264 genes in post-mortem brain tissue (*GRK4*, *KLHDC8B*, *PDS5A*, *PSMD7*, *TMEM184B*,  
265 *VRK2* and *WDR27*). The role of these genes in the pathophysiology of AUD is largely  
266 unknown. Previous research suggests that SNPs mapped to these genes are associated with  
267 substance use traits, neuropsychiatric illnesses and neurological endophenotypes as well as  
268 other unrelated traits (see Supplementary File S6). Of note, our lead sQTLs for the *GRK4*  
269 (rs2858038) and *KLHDC8B* (rs3819325) genes were in LD with SNPs associated with  
270 human cigarettes per day (rs2960306,  $R^2=0.29$ ) and smoking cessation (rs7617480,  
271  $R^2=0.07$ )<sup>27</sup>. To investigate potential shared genetic processes across substance use, we  
272 correlated significant splicing TWAS associations across three substance use traits:



273 cigarettes per day<sup>27</sup>, opioid use disorder<sup>28</sup> and cannabis use disorder<sup>29</sup>. Using the 1,397  
274 significant splicing TWAS associations across substance use traits (BH-FDR<0.05; 923  
275 unique genes; see Supplementary File S7), we found substantial overlap – especially  
276 among disordered substance use (all  $r>0.38$ ; see Supplementary Figure S7).

277

## 278 Discussion

279

280 Our study found novel genome-wide and transcriptome-wide splicing associations with  
281 problematic alcohol use and AUD. We found support for our three hypotheses, such that:  
282 genetic factors predicted 1) AUD, 2) alternative mRNA splicing in the brain and 3) that  
283 DNA variants in and around differentially spliced genes contributed to the heritability of  
284 problematic alcohol use. Altogether, we used a handful of methods that provided  
285 consistent evidence implicating genetic factors in AUD-related alternative mRNA splicing.  
286 These data add another layer to the neuroepigenetic understanding of compulsive alcohol  
287 use.

288

289 Extending research on other neurological traits<sup>24,34</sup>, we show that individual genetic  
290 markers (sQTLs) and polygenic risk underlie alternative mRNA splicing associated with  
291 AUD. Similar to other research<sup>35</sup>, we found that sQTLs were enriched among DNaseI  
292 hypersensitivity sites, corroborating that loose chromatin regions are hotspots for alternative  
293 mRNA splicing regulation. Previous splicing studies used a single tissue type<sup>2,35-37</sup> and our  
294 study extends this work and encourages future work to investigate multiple tissue types  
295 when possible - as the genetic links with splicing events may differ by brain region.

296

297 Splicing associations with alcohol misuse occurred in genes involved with  
298 neurotransmission, intracellular signaling and drug/alcohol metabolism. Most alternative  
299 mRNA splicing events were uncharacterized, but a few of the ion channel (*CACNA1A*,  
300 *KCNMA1*) and glutamate receptor (*GRIA2*) associations seemed to affect synaptic  
301 neurotransmission. For instance, in the BLA, we found that individuals with AUD were  
302 more likely to have an exon skipping event of the *GRIA2* flip exon (exon 14), which is  
303 associated with longer glutamate receptor opening and consistent with the BLA pathology  
304 in alcohol use<sup>38-40</sup>.

305

306 The takeaways from our study are in accordance with previous analyses with these data.  
307 While we found a different number of significant AUD associations in human brain tissue  
308 – likely due to methodological differences – we found that differential splicing had more  
309 significant associations with AUD than differential expression<sup>7</sup> and that splicing  
310 associations most frequently incurred exon skipping events and were largely tissue  
311 specific. Also, at the genetic level, we identified an order of magnitude more sQTLs than  
312 the previously reported (and validated) expression QTLs (eQTLs) with AUD<sup>11</sup>. These  
313 results are in accordance with previous analyses suggesting alternative mRNA splicing  
314 elicits robust genetic and neurotranscriptional correlates with psychiatric traits<sup>2</sup> and calls  
315 for additional research to better characterize the gene isoform architecture of mental illness  
316 and substance abuse.

317

318 We found *preliminary* evidence that alternative mRNA splicing could play a more general  
319 role in a common genetic liability of substance use disorders and psychopathology. Our  
320 study revealed moderate splicing associations across disordered and problematic drug use  
321 as well as tobacco consumption, via splicing TWASs. Furthermore, the sQTLs underlying  
322 AUD-related differential splicing in the brain were correlated with DNA variants  
323 previously implicated in tobacco consumption, mental illness, and cognitive functioning.  
324 Additionally, differentially spliced genes correlated with AUD in our analyses were also  
325 linked with brain splicing associations with autism spectrum disorder and schizophrenia<sup>2</sup>,  
326 which included glutamate receptor (*GRIA2*) and calcium signaling genes (*CACNA1G*,  
327 *CAMK2D* and *CAMKMT*) as well as intracellular processes (*AKAP13*, *ARPP21*, *PRKACB*  
328 and *PTPRS*) and synaptic plasticity genes (*ARHGEF10L*, *ARHGEF4*, *CLASP2*, *GAPVD1*,  
329 *NTNG2*, *SUN1* and *TPM3*).

330

331 While our study characterizes the genetic roots of alcohol-related alternative mRNA  
332 splicing, we cannot dismiss the potential for alcohol-induced differential splicing. We  
333 found that many of the differentially spliced genes associated with AUD were also  
334 differentially spliced in primate models of chronic binge drinking. Notably, only five of  
335 these overlapping genes from analogous brain regions had a sQTL (2.9% of sQTLs). This  
336 may suggest both genetic and alcohol-related mechanisms underlying alternative mRNA  
337 splicing in the brain.

338

339 The current study should be interpreted in the context of the following limitations. Genetic  
340 effects from our study should be interpreted with caution and were limited to biallelic  
341 common SNPs. Polygenic scores used PRScise2, which chooses a threshold that  
342 maximizes and may over-fit the data. Additionally, polygenic prediction of splicing was  
343 done on the first principal component that explained < 5% of the variance in differential  
344 mRNA splicing for each brain region. Partitioned heritability analyses indicated that  
345 alternative mRNA splicing explained a significant amount of the heritability, but this is  
346 still ~2% of the total individual differences in problematic alcohol use and may include  
347 non-splicing related DNA variants. We are reticent to interpret individual sQTLs as these  
348 analyses were based on small samples. But, we utilized multiple tissue types and cross-  
349 referenced findings with GWASs with much larger samples. The GWASs used in our  
350 study included some overlapping participants (e.g., UK BioBank and Million Veterans  
351 Project) and were limited to individuals of European Ancestry.

352

353 In conclusion, we found a genetic component to brain-related alternative mRNA splicing  
354 underlying AUD and problematic alcohol use. We unveiled a host of genes that were  
355 differentially spliced between individuals with AUD and controls, which demonstrated  
356 stronger effects than classic differential expression analyses. By marshaling extant data  
357 sources with state-of-the-art methodology, we were able to make novel biological  
358 discoveries that added context to our genetic and neurobiological understanding of  
359 alcoholism.

### **Acknowledgements**

We acknowledge the National Institute on Drug Abuse award DP1DA042103 (awarded to RHCP). We are grateful for all of the participants from the GWAS studies as well as the public availability of the RNA-sequencing data. Without open sourced data or tools none of this research would have been possible.

### **Conflict of Interest**

The authors declare no conflicts of interest.

## References

1. Pan Q, Shai O, Lee LJ, Frey BJ, Blencowe BJ. Deep surveying of alternative splicing complexity in the human transcriptome by high-throughput sequencing. *Nat Genet* 2008; **40**(12): 1413-1415.
2. Gandal MJ, Zhang P, Hadjimichael E, Walker RL, Chen C, Liu S *et al*. Transcriptome-wide isoform-level dysregulation in ASD, schizophrenia, and bipolar disorder. *Science* 2018; **362**(6420).
3. Donadoni M, Cicalese S, Sarkar DK, Chang SL, Sariyer IK. Alcohol exposure alters pre-mRNA splicing of antiapoptotic Mcl-1L isoform and induces apoptosis in neural progenitors and immature neurons. *Cell Death Dis* 2019; **10**(6): 447.
4. Signor S, Nuzhdin S. Dynamic changes in gene expression and alternative splicing mediate the response to acute alcohol exposure in *Drosophila melanogaster*. *Heredity (Edinb)* 2018; **121**(4): 342-360.
5. Farris SP, Arasappan D, Hunicke-Smith S, Harris RA, Mayfield RD. Transcriptome organization for chronic alcohol abuse in human brain. *Mol Psychiatry* 2015; **20**(11): 1438-1447.
6. Lee C, Mayfield RD, Harris RA. Altered gamma-aminobutyric acid type B receptor subunit 1 splicing in alcoholics. *Biol Psychiatry* 2014; **75**(10): 765-773.
7. Van Booven D, Mengying L, Sunil Rao J, Blokhin IO, Dayne Mayfield R, Barbier E *et al*. Alcohol use disorder causes global changes in splicing in the human brain. *Transl Psychiatry* 2021; **11**(1): 2.
8. Zhou H, Sealock JM, Sanchez-Roige S, Clarke TK, Levey DF, Cheng Z *et al*. Genome-wide meta-analysis of problematic alcohol use in 435,563 individuals yields insights into biology and relationships with other traits. *Nat Neurosci* 2020; **23**(7): 809-818.
9. Kranzler HR, Zhou H, Kember RL, Vickers Smith R, Justice AC, Damrauer S *et al*. Genome-wide association study of alcohol consumption and use disorder in 274,424 individuals from multiple populations. *Nat Commun* 2019; **10**(1): 1499.
10. Palmer RH, McGeary JE, Heath AC, Keller MC, Brick LA, Knopik VS. Shared additive genetic influences on DSM-IV criteria for alcohol dependence in subjects of European ancestry. *Addiction* 2015; **110**(12): 1922-1931.

11. Rao X, Thapa KS, Chen AB, Lin H, Gao H, Reiter JL *et al.* Allele-specific expression and high-throughput reporter assay reveal functional genetic variants associated with alcohol use disorders. *Mol Psychiatry* 2021; **26**(4): 1142-1151.
12. Grant KA, Leng X, Green HL, Szeliga KT, Rogers LS, Gonzales SW. Drinking typography established by scheduled induction predicts chronic heavy drinking in a monkey model of ethanol self-administration. *Alcohol Clin Exp Res* 2008; **32**(10): 1824-1838.
13. Baker EJ, Farro J, Gonzales S, Helms C, Grant KA. Chronic alcohol self-administration in monkeys shows long-term quantity/frequency categorical stability. *Alcohol Clin Exp Res* 2014; **38**(11): 2835-2843.
14. Bolger AM, Lohse M, Usadel B. Trimmomatic: a flexible trimmer for Illumina sequence data. *Bioinformatics* 2014; **30**(15): 2114-2120.
15. Dobin A, Davis CA, Schlesinger F, Drenkow J, Zaleski C, Jha S *et al.* STAR: ultrafast universal RNA-seq aligner. *Bioinformatics* 2013; **29**(1): 15-21.
16. Browning BL, Zhou Y, Browning SR. A One-Penny Imputed Genome from Next-Generation Reference Panels. *Am J Hum Genet* 2018; **103**(3): 338-348.
17. Choi SW, Mak TS-H, O'Reilly PF. Tutorial: a guide to performing polygenic risk score analyses. *Nature Protocols* 2020; **15**(9): 2759-2772.
18. Li YI, Knowles DA, Humphrey J, Barbeira AN, Dickinson SP, Im HK *et al.* Annotation-free quantification of RNA splicing using LeafCutter. *Nat Genet* 2018; **50**(1): 151-158.
19. Smedley D, Haider S, Ballester B, Holland R, London D, Thorisson G *et al.* BioMart--biological queries made easy. *BMC Genomics* 2009; **10**: 22.
20. Love MI, Huber W, Anders S. Moderated estimation of fold change and dispersion for RNA-seq data with DESeq2. *Genome Biol* 2014; **15**(12): 550.
21. Choi SW, O'Reilly PF. PRSice-2: Polygenic Risk Score software for biobank-scale data. *Gigascience* 2019; **8**(7).
22. Wang K, Li M, Hakonarson H. ANNOVAR: functional annotation of genetic variants from high-throughput sequencing data. *Nucleic Acids Res* 2010; **38**(16): e164.
23. Zhao H, Sun Z, Wang J, Huang H, Kocher JP, Wang L. CrossMap: a versatile tool for coordinate conversion between genome assemblies. *Bioinformatics* 2014; **30**(7): 1006-1007.

24. Li YI, Wong G, Humphrey J, Raj T. Prioritizing Parkinson's disease genes using population-scale transcriptomic data. *Nat Commun* 2019; **10**(1): 994.
25. Barbeira AN, Pividori M, Zheng J, Wheeler HE, Nicolae DL, Im HK. Integrating predicted transcriptome from multiple tissues improves association detection. *PLoS Genet* 2019; **15**(1): e1007889.
26. Barbeira AN, Dickinson SP, Bonazzola R, Zheng J, Wheeler HE, Torres JM *et al.* Exploring the phenotypic consequences of tissue specific gene expression variation inferred from GWAS summary statistics. *Nat Commun* 2018; **9**(1): 1825.
27. Liu M, Jiang Y, Wedow R, Li Y, Brazel DM, Chen F *et al.* Association studies of up to 1.2 million individuals yield new insights into the genetic etiology of tobacco and alcohol use. *Nat Genet* 2019; **51**(2): 237-244.
28. Zhou H, Rentsch CT, Cheng Z, Kember RL, Nunez YZ, Sherva RM *et al.* Association of OPRM1 Functional Coding Variant With Opioid Use Disorder: A Genome-Wide Association Study. *JAMA Psychiatry* 2020; **77**(10): 1072-1080.
29. Johnson EC, Demontis D, Thorgeirsson TE, Walters RK, Polimanti R, Hatoum AS *et al.* A large-scale genome-wide association study meta-analysis of cannabis use disorder. *Lancet Psychiatry* 2020; **7**(12): 1032-1045.
30. Schlesinger F, Tammema D, Krampfl K, Bufler J. Desensitization and resensitization are independently regulated in human recombinant GluR subunit coassemblies. *Synapse* 2005; **55**(3): 176-182.
31. Penn AC, Balik A, Wozny C, Cais O, Greger IH. Activity-mediated AMPA receptor remodeling, driven by alternative splicing in the ligand-binding domain. *Neuron* 2012; **76**(3): 503-510.
32. Acosta G, Freidman DP, Grant KA, Hemby SE. Alternative splicing of AMPA subunits in prefrontal cortical fields of cynomolgus monkeys following chronic ethanol self-administration. *Front Psychiatry* 2011; **2**: 72.
33. Heck J, Parutto P, Ciuraszkiewicz A, Bikbaev A, Freund R, Mitlöhner J *et al.* Transient Confinement of Ca(V)2.1 Ca(2+)-Channel Splice Variants Shapes Synaptic Short-Term Plasticity. *Neuron* 2019; **103**(1): 66-79.e12.
34. Chen L, Tian L, MacDonald SH, McClafferty H, Hammond MS, Huibant JM *et al.* Functionally diverse complement of large conductance calcium- and voltage-activated potassium channel (BK) alpha-subunits generated from a single site of splicing. *J Biol Chem* 2005; **280**(39): 33599-33609.

35. Raj T, Li YI, Wong G, Humphrey J, Wang M, Ramdhani S *et al.* Integrative transcriptome analyses of the aging brain implicate altered splicing in Alzheimer's disease susceptibility. *Nat Genet* 2018; **50**(11): 1584-1592.
36. Takata A, Matsumoto N, Kato T. Genome-wide identification of splicing QTLs in the human brain and their enrichment among schizophrenia-associated loci. *Nat Commun* 2017; **8**: 14519.
37. Zhang X, Joehanes R, Chen BH, Huan T, Ying S, Munson PJ *et al.* Identification of common genetic variants controlling transcript isoform variation in human whole blood. *Nat Genet* 2015; **47**(4): 345-352.
38. Pei W, Huang Z, Wang C, Han Y, Park JS, Niu L. Flip and flop: a molecular determinant for AMPA receptor channel opening. *Biochemistry* 2009; **48**(17): 3767-3777.
39. Gilpin NW, Herman MA, Roberto M. The central amygdala as an integrative hub for anxiety and alcohol use disorders. *Biol Psychiatry* 2015; **77**(10): 859-869.
40. Janak PH, Tye KM. From circuits to behaviour in the amygdala. *Nature* 2015; **517**(7534): 284-292.

## Figure Legends

### **Figure 1** *Schematic Representation of Our Study*

**Figure 2** *Genetic Risk for Problematic Alcohol Use and Alternative mRNA Splicing.* **A)** Violin plot showing polygenic score distributions of problematic alcohol use between individuals with AUD and controls. Mean and standard error are shown. **B)** Heat matrix showing the amount of variance explained ( $R^2$ ) by polygenic prediction of differential splicing results for each brain region. Principal component (PC) analysis was used to distil differential splicing results into a single metric (1<sup>st</sup> PC) that explained less than 5% of the variance in AUD-related splicing for each brain region (1<sup>st</sup> PC<sub>BLA</sub> = 4.364%; 1<sup>st</sup> PC<sub>CEA</sub> = 2.922%; 1<sup>st</sup> PC<sub>NAc</sub> = 2.32%; 1<sup>st</sup> PC<sub>PFC</sub> = 2.951). For results of polygenic score analyses with clumping see Supplementary Figure S2.

**Figure 3** *Alternative mRNA Splicing Associations with AUD by Brain Region.* **A)** Volcano plot displaying differentially spliced genes between individuals with AUD and controls for each brain region. **B)** Scatter plot showing differential splicing associations across brain regions from differentially spliced genes. Note  $\Delta$ PSI stands for the change in percent-spliced-in and that each colored dot represents a specific splicing event in a cluster from a significantly differentially spliced gene ( $p_{\text{adj}} < 0.05$ )

**Figure 4** *Individual DNA Markers Predict Alternative mRNA Splicing Events Associated with AUD.* **A)** Volcano plot showing results from our sQTL analyses. Each dot above the dashed red line represents a significant ( $p_{\text{adj}} < 0.05$ ) SNP association with a differentially spliced gene. **B)** Bar plot showing the genomic regions enriched for significant sQTL associations. \* indicated that a certain genomic region survived correction for multiple testing ( $p_{\text{adj}} < 0.05$ ).

**Figure 5** *SNPs Within and Around Differentially Spliced Genes Contribute to the Heritability of Problematic Alcohol Use.* Heritable factors include the observed heritability from LD score regression analyses. Splicing genes include all biallelic SNPs within and 1 Mb around the transcription start and end site of differentially spliced genes associated with AUD in the brain.



# Study Overview

## 1) Polygenic Score

- a) Predict AUD
- b) Predict mRNA Splicing

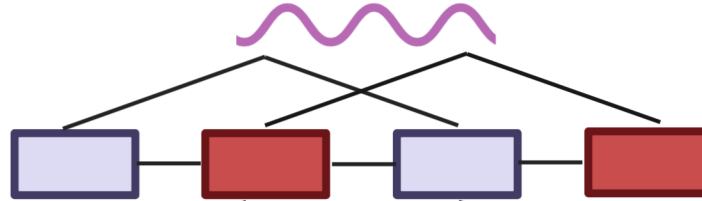

## 2) Differential mRNA Splicing

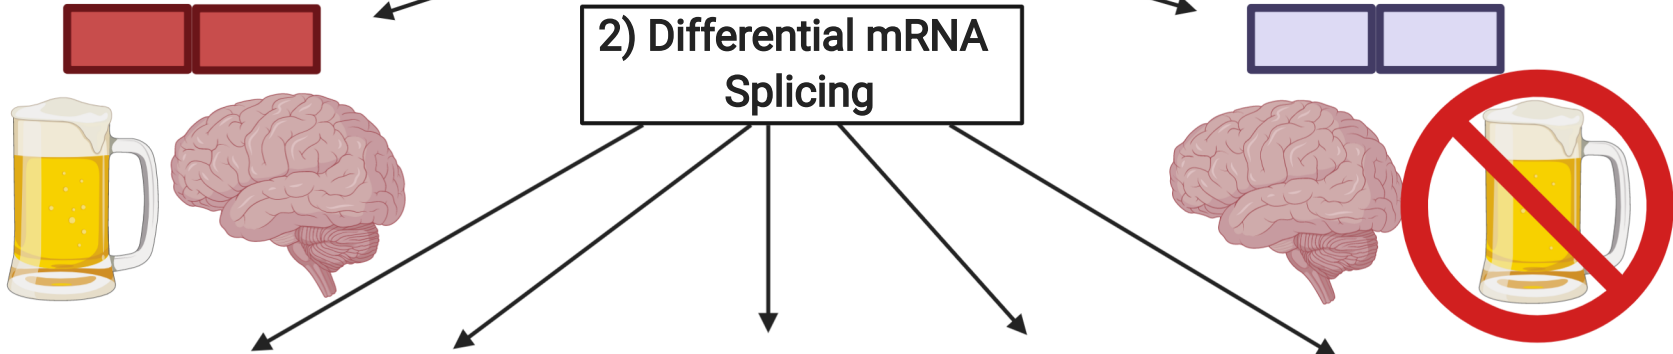

## 3) Brain Region Associations

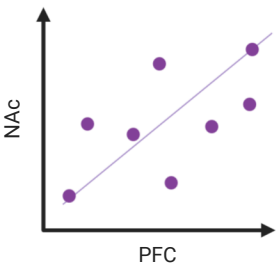

## 4) Overlap with Monkeys

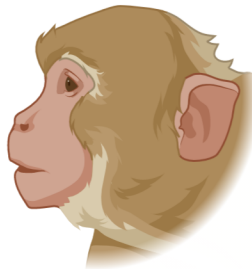

## 5) sQTLs

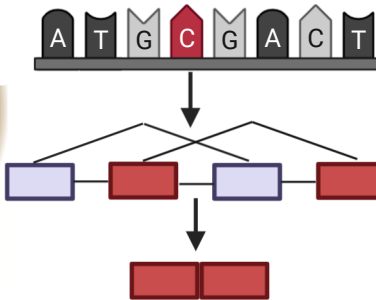

## 6) Partitioned Heritability

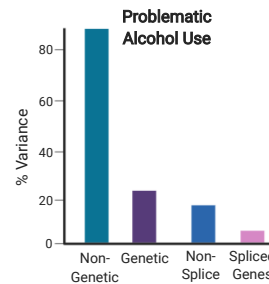

## 7) Splicing TWAS

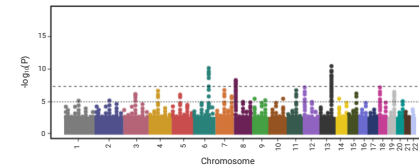

## Polygenic Risk Predicting AUD

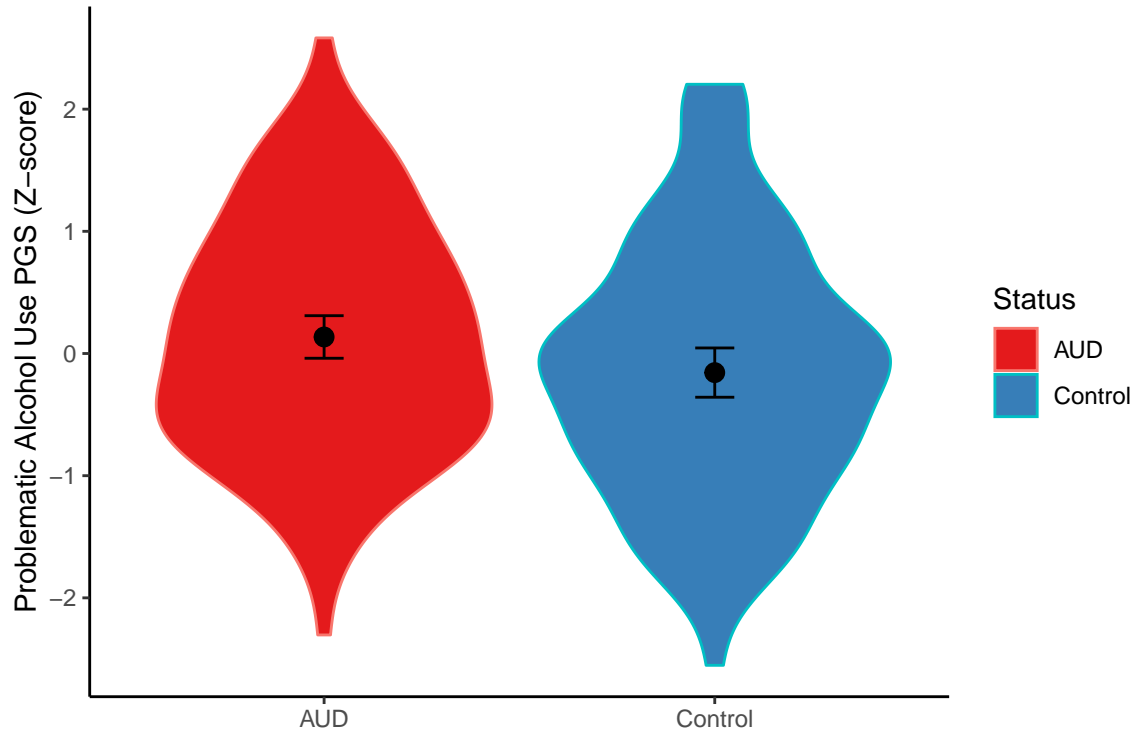

## Polygenic Risk Predicting Alternative mRNA Splicing

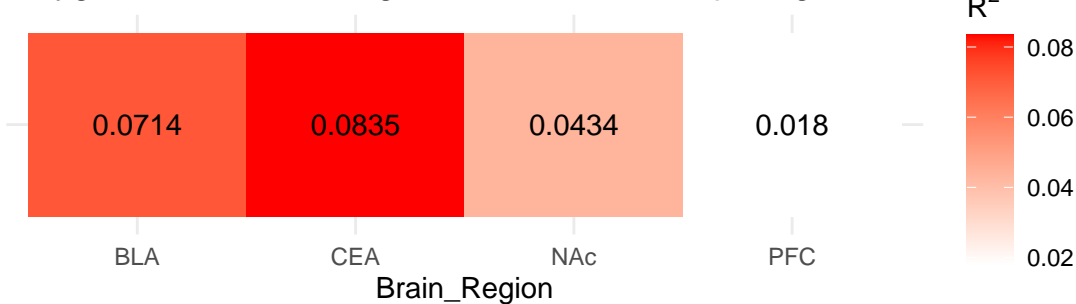

### Differential Splicing: Associations by Brain Region

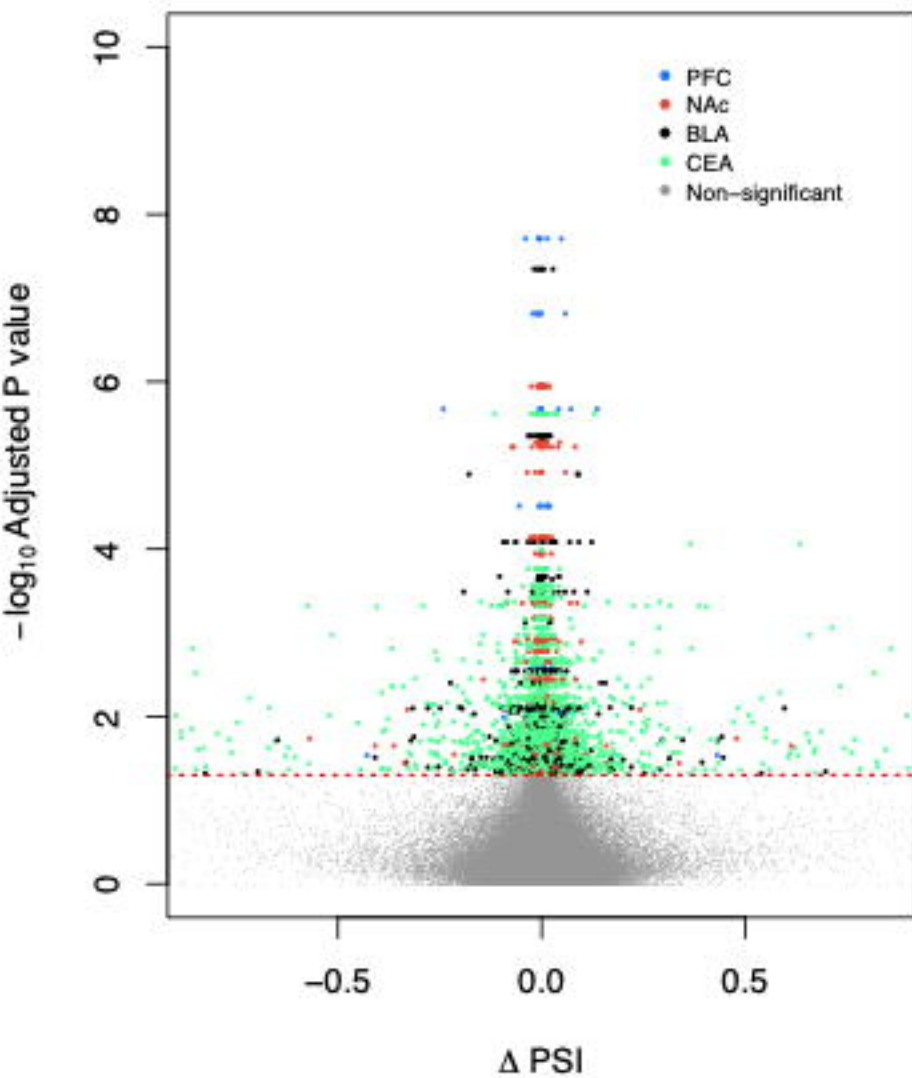

### Differentially Spliced Genes: Associations Across Brain Regions

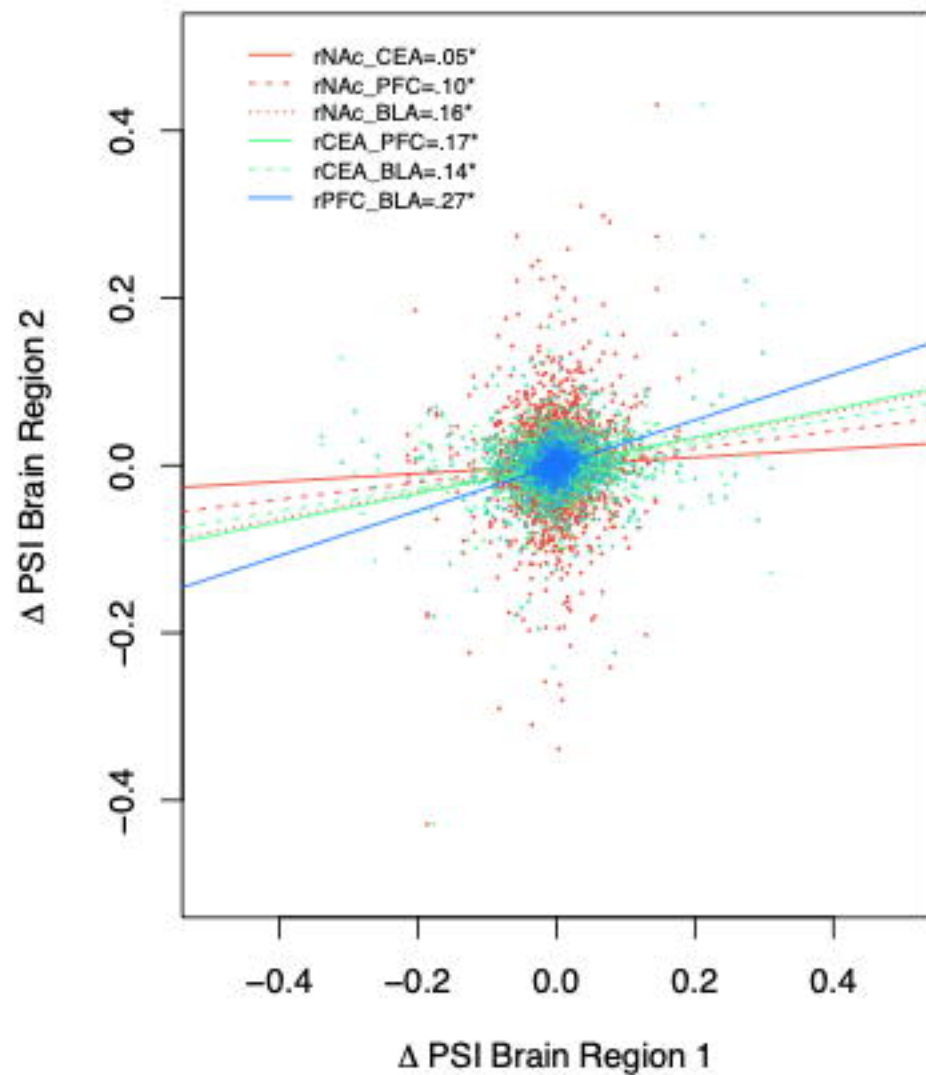

## Splicing Quantitative Trait Loci (sQTLs)

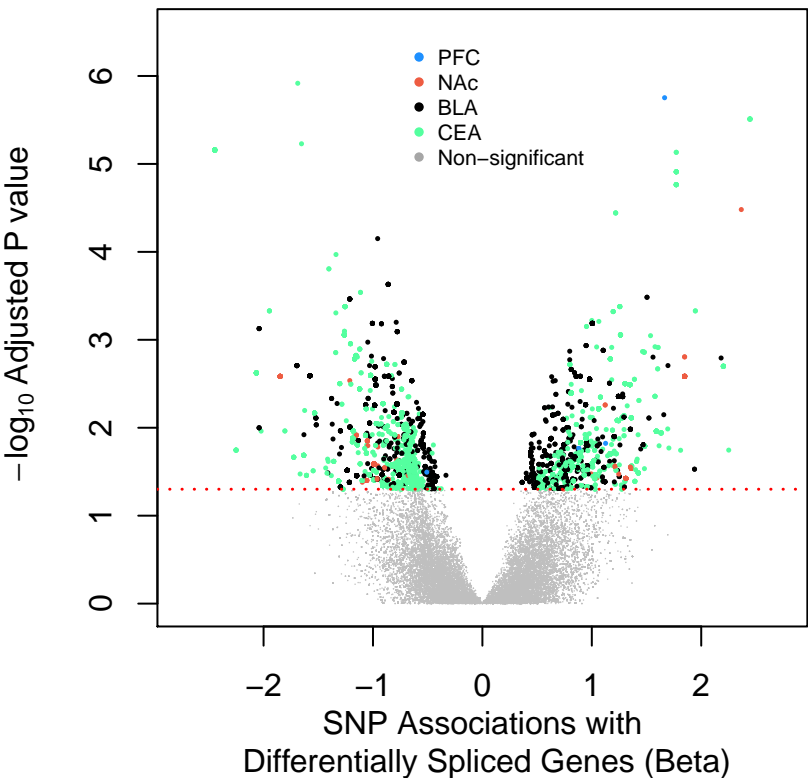

## sQTL Annotation

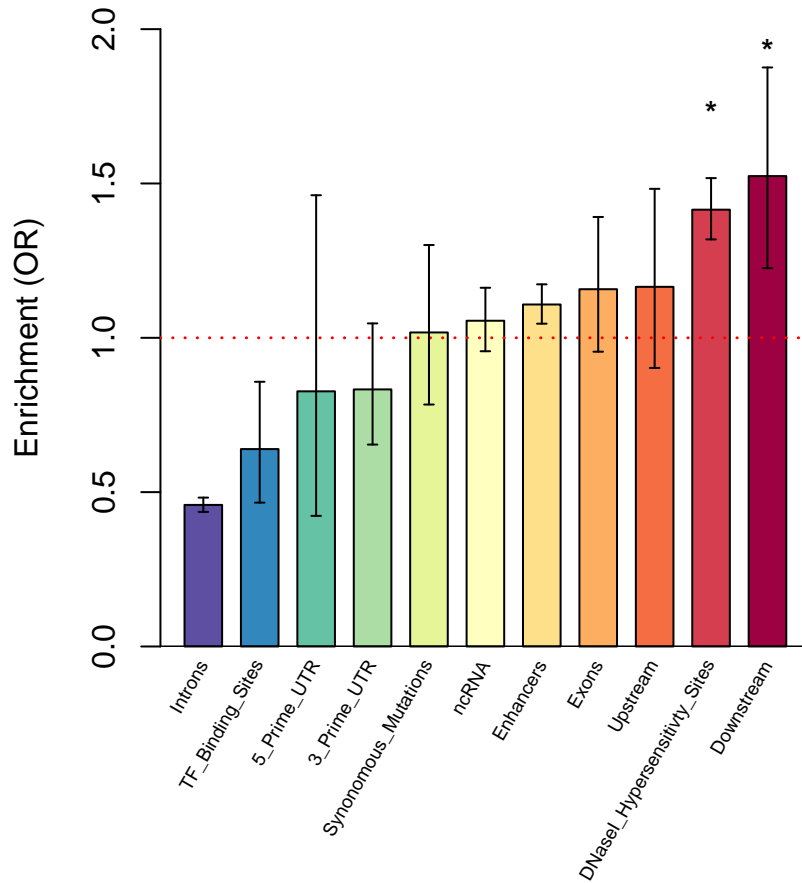

# Individual Differences for Problematic Alcohol Use

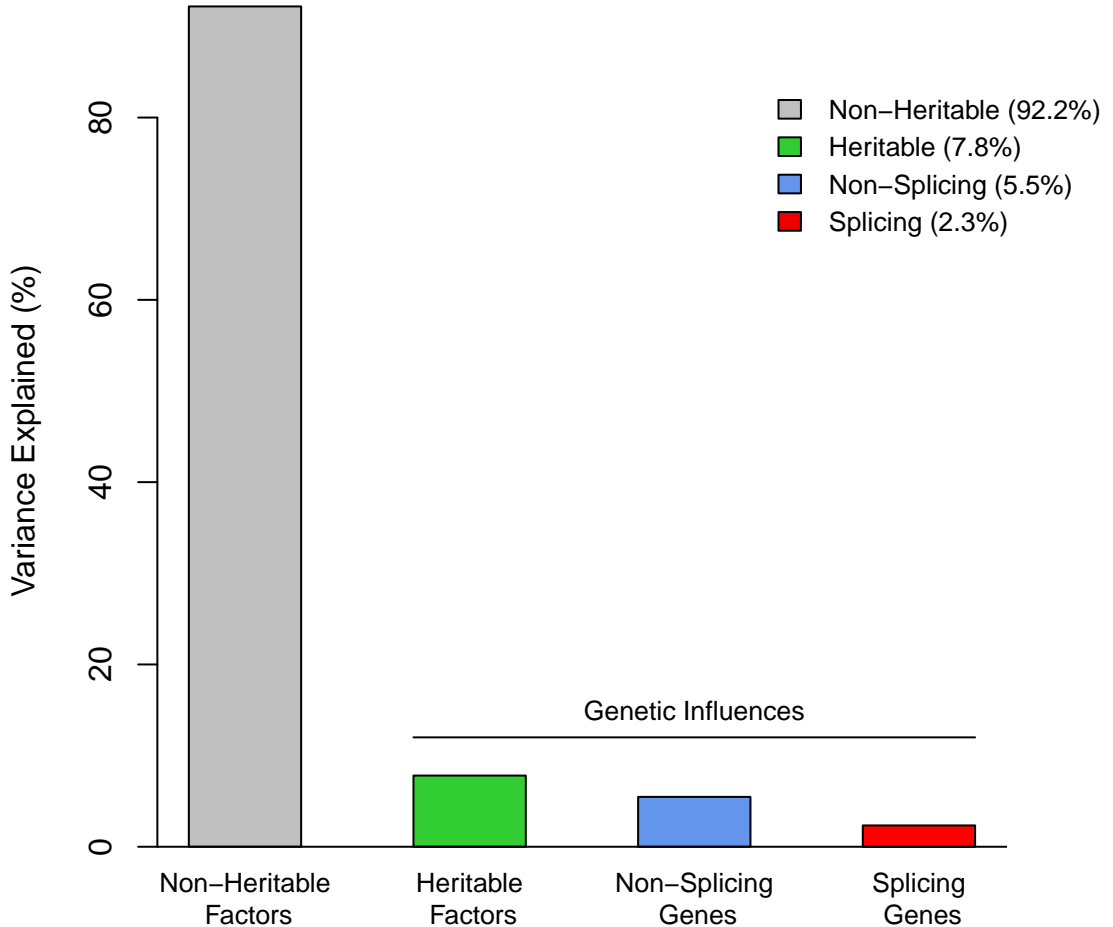

Source: https://biorxiv.org/content/10.1101/2021.03.31.437932v1.full.pdf
